# Supplementary material for: Identification of IFN-γ-producing T cells as the main mediators of the side effects associated to mouse interleukin-15 sustained exposure
Source: PubMed Central journal article supplement (PMC5226487; doi:10.18632/oncotarget.10264), 2016-06-23
Supplement: oncotarget-07-49008-s001.pdf [file oncotarget-07-49008-s001.pdf]

# Identification of IFN- $\gamma$ -producing T cells as the main mediators of the side effects associated to mouse interleukin-15 sustained exposure

## Supplementary Material

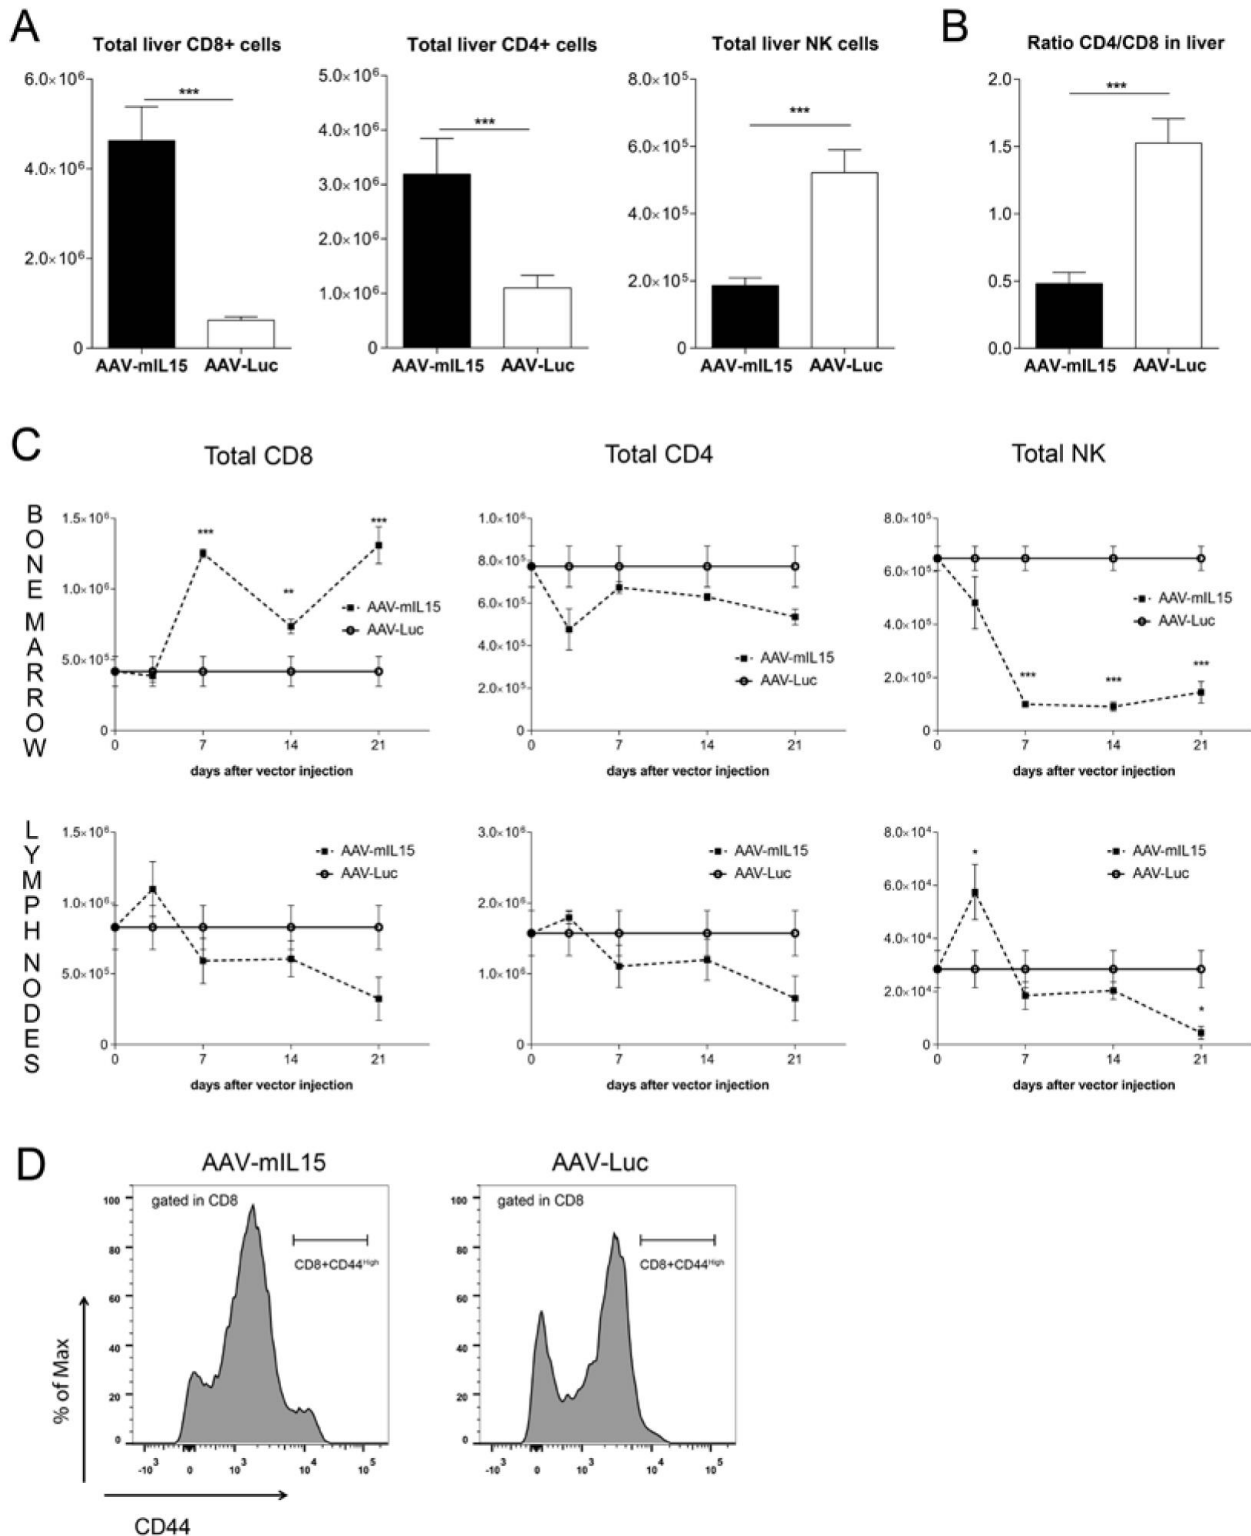

**Supplementary Figure 1. Analysis of lymphocyte subsets after administration of AAV-mIL15.** **A.** Twenty-one days after the administration AAV-mIL15 or AAV-Luc at a dose of  $1.5 \times 10^{13}$  vg/kg mice were sacrificed and the number of CD8, CD4 and NK cells obtained from the liver was analyzed by flow cytometry. **B.** The ratio CD4/CD8 is shown. Results are expressed as the mean  $\pm$  SD of 6-8 mice per group. **C.** 3, 7, 14, and 21 days after the administration AAV-mIL15 or AAV-Luc at a dose of  $1.5 \times 10^{13}$  vg/kg mice were sacrificed and the number of CD8, CD4 and NK cells obtained from the bone marrow and lymph nodes was analyzed by flow cytometry. **D.** The activation status of CD8 was determined by analyzing the expression of CD44. Representative flow cytometry histograms of a mouse from each group are shown.

**A**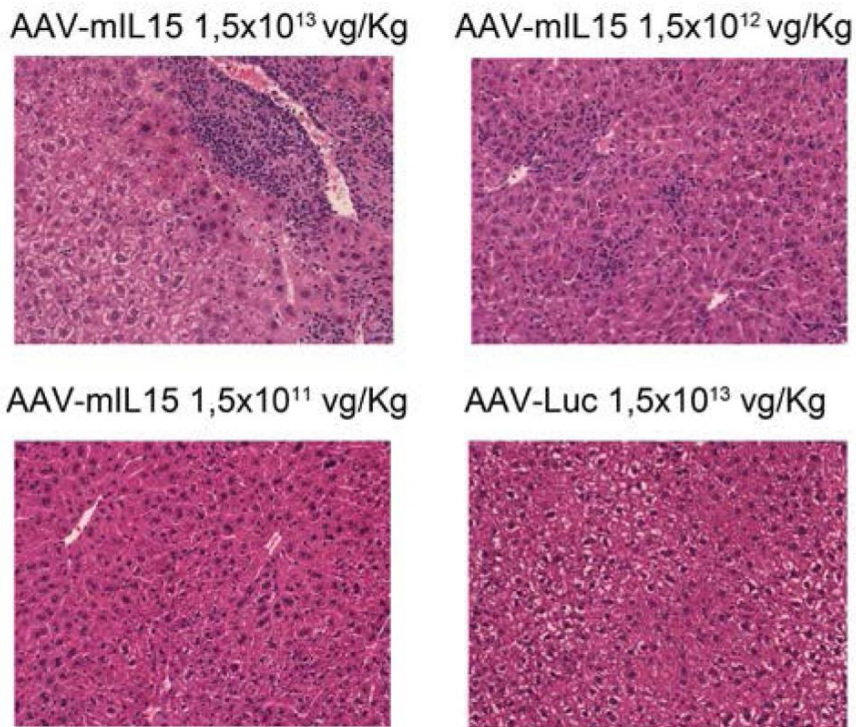**B**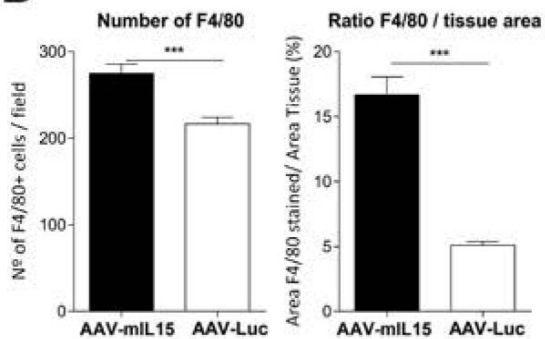**C**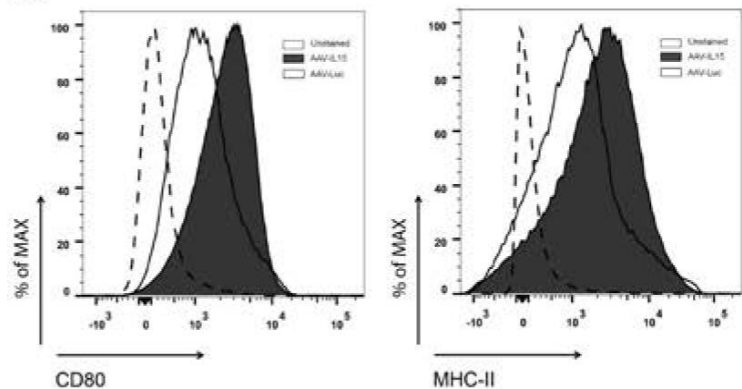**D**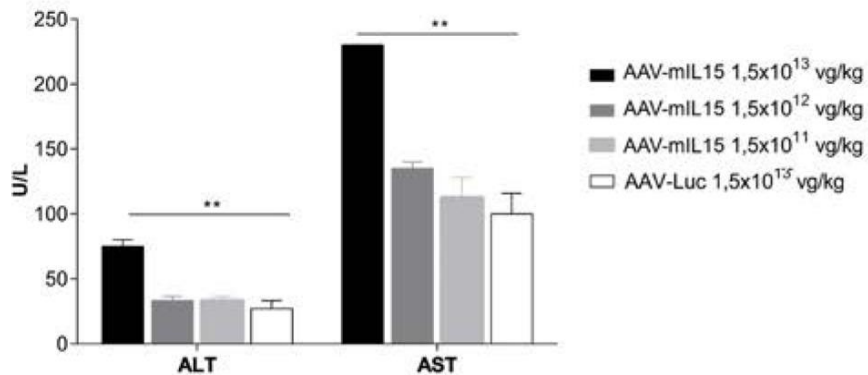

**Supplementary Figure 2. Characterization of intrahepatic leukocyte population and liver damage of mice receiving AAV-mIL15 or AAV-Luc.** A. C57BL/6 male mice (n=8) were intravenously injected with three different doses of AAV-

mIL15  $1.5 \times 10^{11}$ ,  $1.5 \times 10^{12}$ , and  $1.5 \times 10^{13}$  vg/Kg or  $1.5 \times 10^{13}$  vg/Kg of AAV-Luc. Twenty-one days after AAV injection mice were sacrificed. Livers were harvested and H&E staining was performed. Representative images one of the animals per group were shown. **B.** Liver sections obtained from mice treated with  $1.5 \times 10^{13}$  vg/Kg of AAV-mIL15 or AAV-Luc for 21 days were analysed by F4/80 Immunohistochemistry using an anti-F4/80 antibody. The number of F4/80 positive cells and the area stained by the F4/80 antibody were quantified. Results are expressed as the mean  $\pm$  SD of 8 mice per group. **C.** The activation status of F4/80 positive cells obtained from mice treated with  $1.5 \times 10^{13}$  vg/Kg of AAV-mIL15 or AAV-Luc for 21 days was determined by analyzing the expression of CD80 and MHC class II (MHCII). Representative flow cytometry histograms of a mouse from each group are shown. **D.** Serum biochemical analysis of ALT and AST. Results are expressed as the mean  $\pm$  SD of 6-8 mice per group.

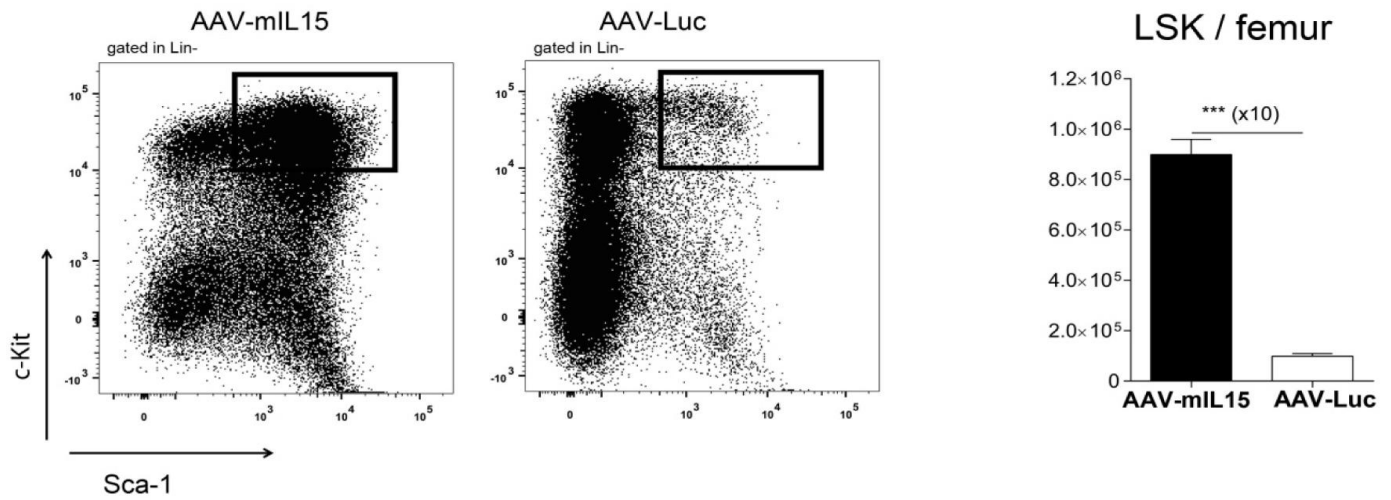

**Supplementary Figure 3. Long term IL-15 expression induces expansion of LSK population in bone marrow.** (left) Representative flow cytometry analysis of Lineage negative (Lin-) cKit<sup>+</sup> and Sca-1<sup>+</sup> cells (LSK) of BM cells obtained from mice treated with  $1.5 \times 10^{13}$  vg/Kg of AAV-mIL15 or AAV-Luc. The analysis was performed three weeks after vector injection. (right) Bar graphs represent the quantitative analysis of numbers of LSK (left). Results are expressed as the mean  $\pm$  SD of 4 mice per group

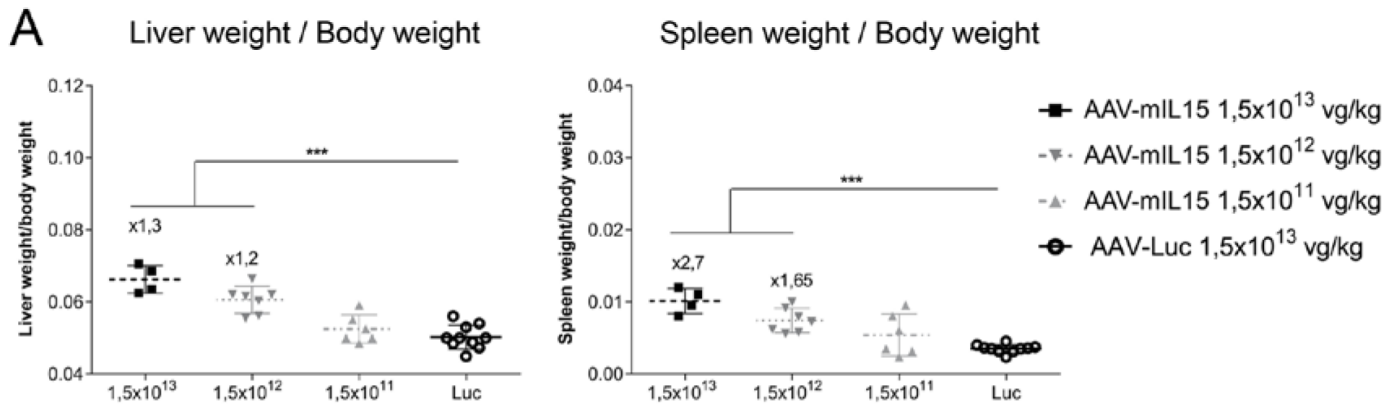

**Supplementary Figure 4. Analysis of liver and spleen weight parameters in IFN $\gamma$ R KO mice after AAV-mIL15 injection.** IFN $\gamma$ R $^{-/-}$  received  $1.5 \times 10^{13}$ ,  $1.5 \times 10^{12}$  or  $1.5 \times 10^{11}$  v vg/kg of AAV-mIL15 or  $1.5 \times 10^{13}$  AAV-Luc (N=4-8 mice per group). Twenty-one days after vector administration mice were sacrificed and the liver and spleen were weighed and compared.

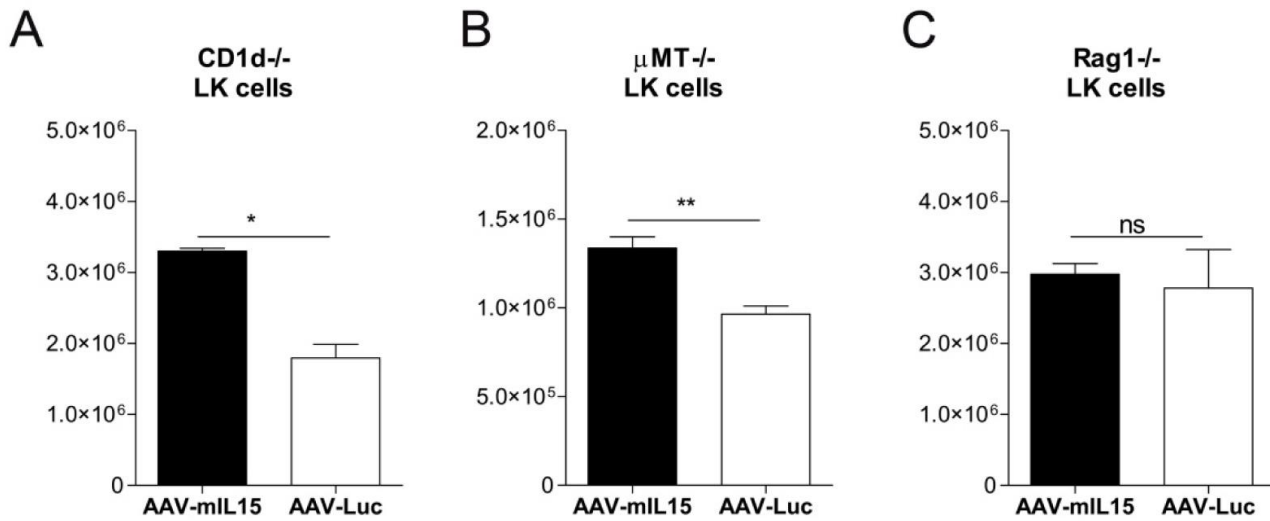

**Supplementary Figure 5. Analysis of LK population in the bone marrow of different mice strain.** Twenty-one days after vector administration, mice treated with a dose of AAV-mIL15 or AAV-Luc  $1.5 \times 10^{13}$  vg/kg were sacrificed and bone marrow cells were examined for surface expression of Lin<sup>-</sup> and c-Kit to determine the number of LK cells per femur. Absolute number of LK cells in BM per femur was determined in CD1d<sup>-/-</sup> **A.**, μMT<sup>-/-</sup> **B.** and Rag1<sup>-/-</sup> **C.** mice. Results are expressed as the mean ± SD of 4-5 mice per group.
